# Supplementary material for: miR-152 Regulates Bovine Myoblast Proliferation by Targeting KLF6
Source: MDPI journal article supplement (doi:10.3390/ani11103001), 2021-10-19
Supplement: s1 [file s1]

**Table S1.** Primers sequence for PCR and RT-qPCR

| Name            | Sense Primers                                       | Antisense Primers                     |
|-----------------|-----------------------------------------------------|---------------------------------------|
| GAPDH           | TGAGGACCAGGTTGTCTCCTGCG                             | CACCACCCTGTTGCTGTAGCCA                |
| ACTB            | CTGGAACGGTGAAGGTGACA                                | AATGGACTTCCTGTAACAATGCA               |
| PCNA            | TCCAGAACAAGAGTATAGC                                 | TACAACAGCATCTCCAAT                    |
| CDK2            | TTTGCTGAGATGGTGACCCG                                | TAACTCCTGGCCAAACCACC                  |
| miR-152-RT      | GTCGTATCCAGTGCAGGGTCCGAGGTATTCGCACTGGATACGACCCCAAGT |                                       |
| miR-152         | GGCGGTCAGTGCATGACA                                  | CCAGTGCAGGGTCCGAGGTA                  |
| psiCHECK2-KLF6  | CCG <u>CTCGAG</u> CTGCACATGAAGAGACACC               | ATAAGAAT <u>GCGGCCG</u> CTTCTCAGTGCAC |
|                 | TCTG                                                | ATGCTCACGGC                           |
| psiCHECK2-KLF6- | CCG <u>CTCGAG</u> CTGCACATGAAGAGACACC               | ATAAGAAT <u>GCGGCCG</u> CTTCTCAGACCAC |
| Mutant          | TCTG                                                | ATGCTCACGGC                           |

**Table S2.** The primary antibody and secondary antibody.

| Antibody name    | Purpose            | Source         |
|------------------|--------------------|----------------|
| Actin            | primary antibody   | Abbkine        |
| CDK2             | primary antibody   | Sangon Biotech |
| PCNA             | primary antibody   | Sangon Biotech |
| KLF6             | primary antibody   | bioess         |
| GAPDH            | primary antibody   | Sangon Biotech |
| Goat Anti-Rabbit | secondary antibody | BOSTER         |

**a**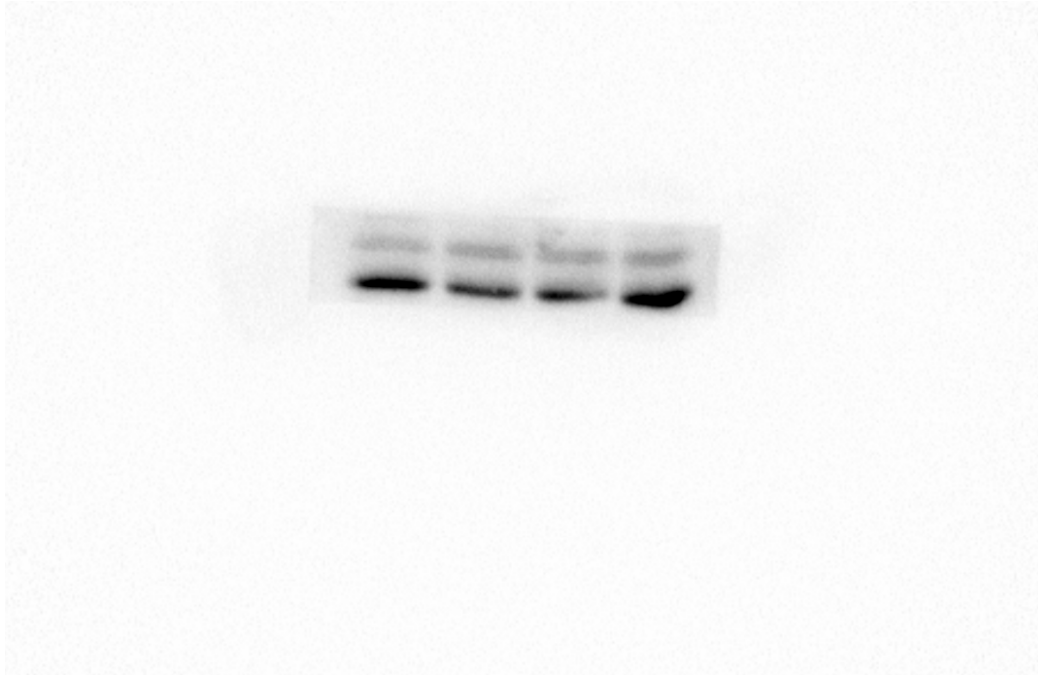

**b**

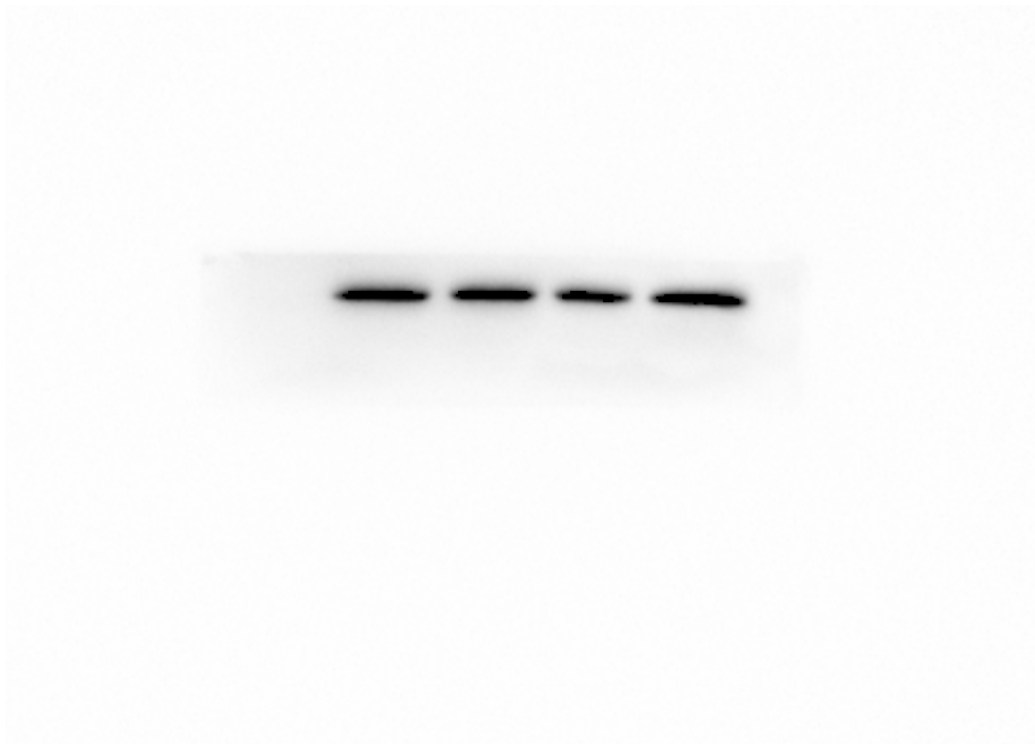

**c**

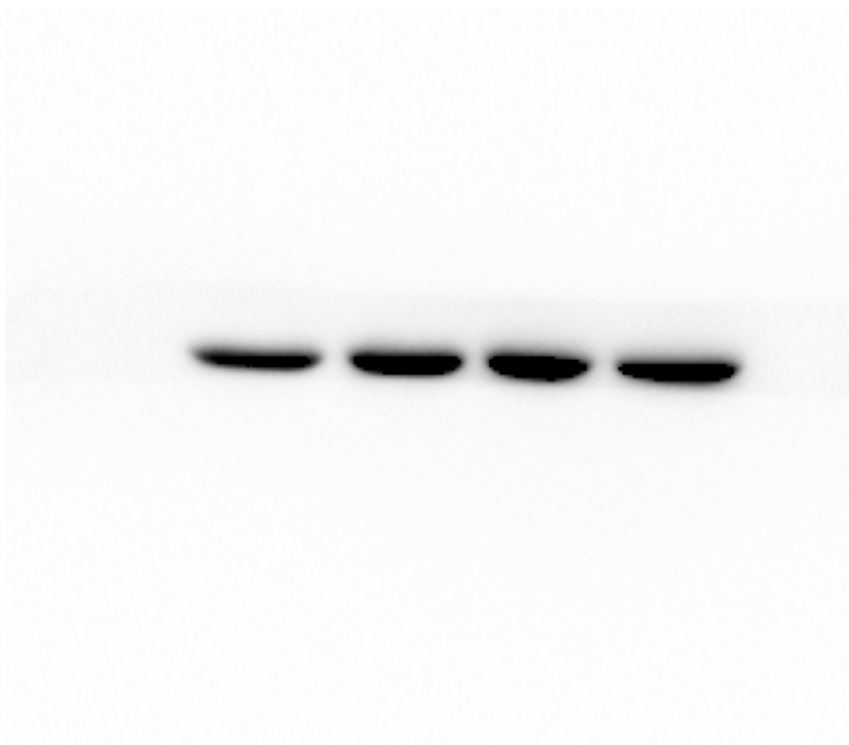

**Figure S1.** Original western blot figures for Figure2C & 3C. **(a)** CDK2, Left to right NC, miR-152 mimic, NC, miR-152 inhibitor. **(b)** PCNA, Left to right NC, miR-152 mimic, NC, miR-152 inhibitor. **(c)** Actin.

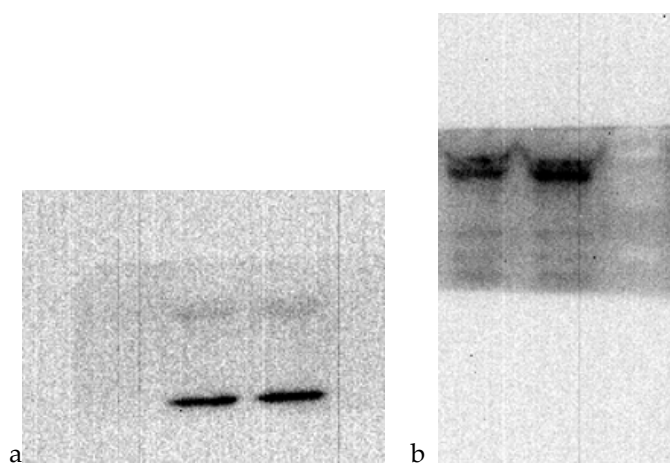

**Figure S2.** Original western blot figures for Figure4C. Right to left: NC miR-152 mimic (a) GAPDH; (b) KLF6.

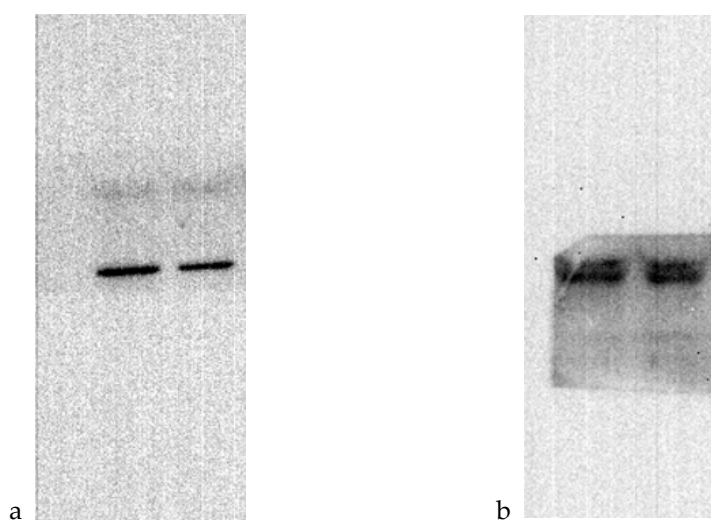

**Figure S3.** Original western blot figures for Figure4D. Right to left: NC miR-152 inhibitor. (a) GAPDH; (b) KLF6.
